# Supplementary material
Source: PubMed Central journal article supplement (PMC1756339)
Supplement: emermedj_21_1_47__1.pdf [file emermedj_21_1_47__1.pdf]

## Appendix 1: Participants in Delphi Study

### PARTICIPANTS IN DELPHI STUDY TO IDENTIFY PERFORMANCE INDICATORS FOR EMERGENCY MEDICINE

#### Emergency Department Consultants:

|                       |                                                                   |
|-----------------------|-------------------------------------------------------------------|
| Dr Fiona Lecky        | Hope Hospital, Salford                                            |
| Mr Mike Clancy        | Southampton General Hospital                                      |
| Mrs Ursula Mackintosh | Stirling Royal Infirmary                                          |
| Mr Kyee Han           | Middlesbrough General Hospital                                    |
| Mr Nick Harrop        | Blackpool Victoria Hospital                                       |
| Miss Gillian Bryce    | Taunton and Somerset Hospital                                     |
| Mr Jim Wardrope       | Northern General Hospital, Sheffield                              |
| Dr Julian Webb        | Kent and Sussex Hospital, Clinical Services Committee             |
| Dr Stephen Nash       | Bromley Hospital, Clinical Services Committee                     |
| Mr Martin Shalley     | Birmingham Heartlands Hospital, Clinical Services Committee       |
| Dr Sue Robinson       | Addenbrookes Hospital, Cambridge                                  |
| Mr Matthew Cooke      | University of Warwick                                             |
| Dr Tina Sajjanhar     | Paediatrics, University Hospital, Lewisham                        |
| Miss Nira Burchett    | Queen Elizabeth Hospital, Kings Lynn, Clinical Services Committee |
| Dr Ian Maconochie     | Paediatrics, St Mary's Hospital, Paddington                       |
| Dr Michael Beckett    | West Middlesex Hospital, Isleworth                                |
| Dr Alastair McGowan   | St James's University Hospital, Leeds                             |
| Mr Jim Ferguson       | Aberdeen Royal Infirmary                                          |
| Miss Ruth Brown       | Kings College Hospital, London                                    |
| Mr Alistair Gray      | Stepping Hill Hospital, Stockport                                 |

Specialist Registrar in Emergency Medicine

Mr Andres Martin      Royal Free Hospital, Clinical Services Committee

Emergency Department Nurses

Mr Rob Crouch      Southampton General Hospital

Mrs Victoria Saynor      Royal Preston Hospital

Ms Karen Castille      NPAT, DH

Mr Andrew Kent      WEST/NPAT, DH

Miss Julie Flaherty(Paed)      Manchester Royal Infirmary/Booths Hall Childrens Hosp

Patients Representative

Mr Martin Loughna      Community Health Council

Inpatient Specialists

Mr Iain Anderson      Consultant Surgeon, Hope Hospital

Dr Richard Hardern      Consultant in Medicine and A&E, Leeds General Infirmary

Dr Kevin Jones      Consultant in Respiratory Medicine, Royal Bolton Hospital

Mr Paul Pynsent      Royal Orthopaedic Hospital, Birmingham

Mr Keith Willett      Orthopaedic Surgeon, John RadcliffeHospital, Oxford

Professor Simon Wesseley      Consultant Psychiatrist, Maudsley Hospital, London
